# Supplementary material for: Exosomes Released by Islet-Derived Mesenchymal Stem Cells Trigger Autoimmune Responses in NOD Mice
Source: PubMed Central journal article supplement — Diabetes. 2014 Feb 13;63(3):1008–20. doi: 10.2337/db13-0859 (PMC3931393; doi:10.2337/db13-0859), 2014-02-13

## SUPPLEMENTARY DATA

**Supplementary Figure 1.** In vitro culture of islet MSC-like cells. A. Islet stromal cells isolated from NOD.mip-GFP mice (pooled from 4-5 mice) and cultured in vitro for different periods. GFP expression diminished in the cultured cells confirming the absence of insulin-producing  $\beta$ -cells in the culture.

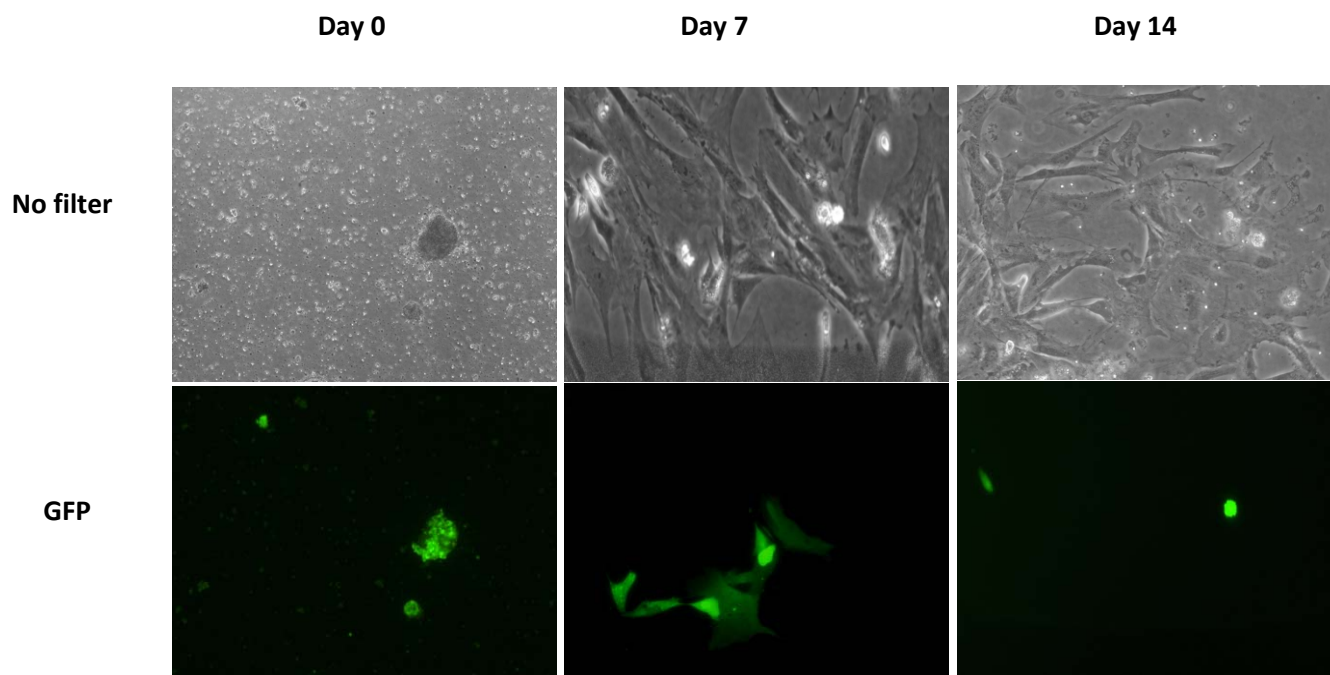

**Supplementary Figure 2.** Electron micrograph of EXOs. EXOs were isolated by ultracentrifugation of iMSC culture supernatants and resuspended in PBS. Negative staining was performed with uranyl acetate.

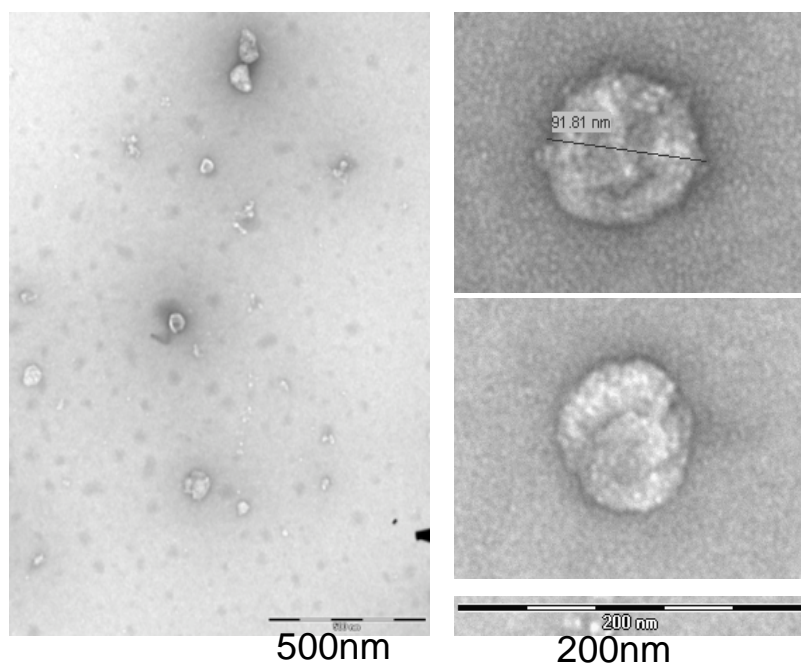

Supplement: supp_db13-0859_DB130859SupplementaryData.pdf [file supp_db13-0859_DB130859SupplementaryData.pdf]
